# Supplementary material for: Carnitine palmitoyltransferase 1C contributes to progressive cellular senescence
Source: PubMed Central journal article supplement (PMC7202531; doi:10.18632/aging.103033), 2020-04-14
Supplement: aging-12-103033-s001..pdf [file aging-12-103033-s001..pdf]

## SUPPLEMENTARY TABLES

**Supplementary Table 1. Sequence of primers for quantitative RT-PCR analysis.**

| <b>Gene Name</b>             | <b>Genebank Accession</b> | <b>Species Specificity</b> | <b>Sequences of Primers</b>                                                     |
|------------------------------|---------------------------|----------------------------|---------------------------------------------------------------------------------|
| <i>β-actin</i>               | NM_0011101                | Human                      | forward 5'- CCTTGCACATGCCGGAG-3'<br>reverse 5'-GCACAGAGCCTCGCCTT-3'             |
| <i>CPT1A</i>                 | NM_001876                 | Human                      | forward 5'-GCCTCGTATGTGAGGCCAAAA-3'<br>reverse 5'-TCATCAAGAAATGTCGCACG-3'       |
| <i>CPT1B</i>                 | NM_004377                 | Human                      | forward 5'-GGTCCAGTTTACGGCGATAC-3'<br>reverse 5'-CCTCTCATGGTGAACAGCAA-3'        |
| <i>CPT1C</i>                 | NM_001136052              | Human                      | forward 5'-GGATGGCACTGAAGAGGAAA-3'<br>reverse 5'-TCCTGGAAAAGGCATCTCTC-3'        |
| <i>CPT2</i>                  | NM_000098                 | Human                      | forward 5'-CGGAGTCTCGAGCAGATAGG-3'<br>reverse 5'- GGAAAAGAAGTGCATGAGCA-3'       |
| <i>CRAT</i>                  | NM_001257363              | Human                      | forward 5'-GGGCTCGAGTAGATGACCAC-3'<br>reverse 5'-ATGAGTTTCAGGCCTCAGGA-3'        |
| <i>IL-8</i>                  | NM_000584                 | Human                      | forward 5'- ACTGAGAGTGATTGAGAGTGGAC-3'<br>reverse 5'-AACCCCTCTGCACCCAGTTTTTC-3' |
| <i>PGC-1α</i>                | NM_013261                 | Human                      | forward 5'-AATCCGTCTTCATCCACAGG-3'<br>reverse 5'-GGTGCAGTGACCAATCAGAA-3'        |
| <i>NRF1</i>                  | NM_001040110              | Human                      | forward 5'-AGGAACACGGAGTGACCCAA-3'<br>reverse 5'-TATGCTCGGTGTAAGTAGCCA-3'       |
| <i>TFAM</i>                  | NM_003201                 | Human                      | forward 5'- ATGGCGTTTCTCCGAAGCAT-3'<br>reverse 5'-TCCGCCCTATAAGCATCTTGA-3'      |
| <i>Cytochrome b<br/>TP53</i> | NM_000101                 | Human                      | forward 5'-CCCAGTGGTACTTTGGTGCC-3'<br>reverse 5'-GCGGTCATGTACTTCTGTCCC-3'       |
| <i>CDKN1A</i>                | NM_001126118              | Human                      | forward 5'-CAGCACATGACGGAGGTTGT-3'<br>reverse 5'-TCATCCAAATACTCCACACGC-3'       |
| <i>PPARα</i>                 | NM_078467                 | Human                      | forward 5'-TGTCCGTCAGAACCCATGC-3'<br>reverse 5'-AAAGTCGAAGTTCCATCGCTC-3'        |
| <i>TNFA</i>                  | NM_005036                 | Human                      | forward 5'-CGGTGACTTATCCTGTGGTCC-3'<br>reverse 5'-CCGCAGATTCTACATTCGATGTT-3'    |
| <i>TNFR1</i>                 | NM_000594                 | Human                      | forward 5'-GAGGCCAAGCCCTGGTATG-3'<br>reverse 5'-CGGGCCGATTGATCTCAGC-3'          |
| <i>FAS</i>                   | NM_001065                 | Human                      | forward 5'-AACGAGTGTGTCTCCTGTAGT-3'<br>reverse 5'-GGAGTAGAGCTTGGACTTCCAC-3'     |
| <i>FASL</i>                  | NM_000043                 | Human                      | forward 5'-AGATTGTGTGATGAAGGACATGG-3'<br>reverse 5'-TGTTGCTGGTGAAGTGTGCATT-3'   |
| <i>PRKN</i>                  | NM_000639                 | Human                      | forward 5'-TGCCTTGGTAGGATTGGGC-3'<br>reverse 5'-GCTGGTAGACTCTCGGAGTTC-3'        |
| <i>PINK1</i>                 | NM_004562                 | Human                      | forward 5'-CCCACCTCTGACAAGGAAACA-3'<br>reverse 5'-TCGTGAACAAACTGCCGATCA-3'      |
| <i>CDKN2A</i>                | NM_032409                 | Human                      | forward 5'-GGAGGAGTATCTGATAGGGCAG-3'<br>reverse 5'-AACCCGGTGCTCTTTGTCCAC-3'     |
| <i>OPA1</i>                  | NM_000077                 | Human                      | forward 5'-ATGGAGCCTTCGGCTGACT-3'<br>reverse 5'-GTAAGTATTTCGGTGCCTTGGG-3'       |
| <i>MFN1</i>                  | NM_015560                 | Human                      | forward 5'-CTGCAGGTCCCAAATTGGTT-3'<br>reverse 5'-TCTTTGTCTGACACCTTCTGT-3'       |
| <i>MFN2</i>                  | NM_033540                 | Human                      | forward 5'-CGGGGTGACCTTCGAGC-3'<br>reverse 5'-TTCTGCCATTATGCACCTGGA-3'          |
|                              | NM_001127660              | Human                      | forward 5'-AGCGTTCAGAGGCCATCG-3'<br>reverse 5'-TCCAAGCTTCTTCACCTTCCC-3'         |

**Supplementary Table 2. Sequences of RNAi assay.**

| <b>RNAi Name</b> | <b>Species Specificity</b> | <b>Sequences</b>               |
|------------------|----------------------------|--------------------------------|
| siRNA TP53-1     | Human                      | 5'-GGACAUACCAGCUUAGAUU dTdT-3' |
| siRNA TP53-2     | Human                      | 5'-GCACAGAGGAAGAGAAUCU dTdT-3' |
| siRNA TP53-3     | Human                      | 5'-GACUCCAGUGGUAUCUAC dTdT-3'  |
