# Supplementary material for: Carnitine palmitoyltransferase 1C contributes to progressive cellular senescence
Source: publisher site journal article supplement (doi:10.18632/aging.103033), 2020-04-14
Supplement: Supplementary file [file aging-v12i8-103033-supplementary-material-SD1.pdf]

## SUPPLEMENTARY FIGURES

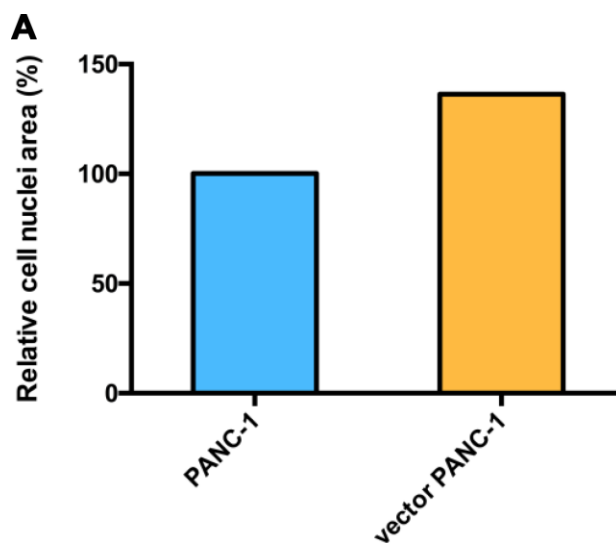

**Supplementary Figure 1. (related to Figure 1). Quantification of the cell nuclei size. (A)** The cell nuclei size was quantified with Image J software.

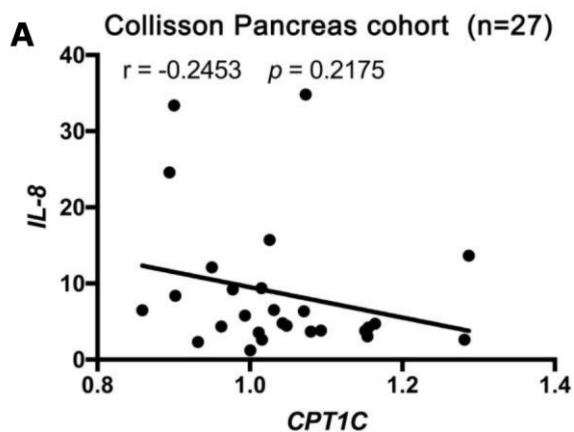

**Supplementary Figure 2. (related to Figure 1). Correlation of key SASP factor, IL-8 with CPT1C expression in pancreatic cancer patients. (A)** IL-8 negatively correlates with CPT1C mRNA expression in pancreatic cancer patients.

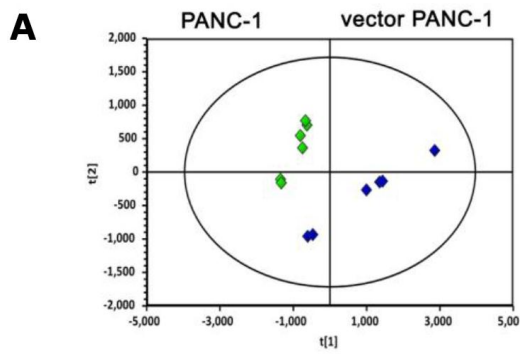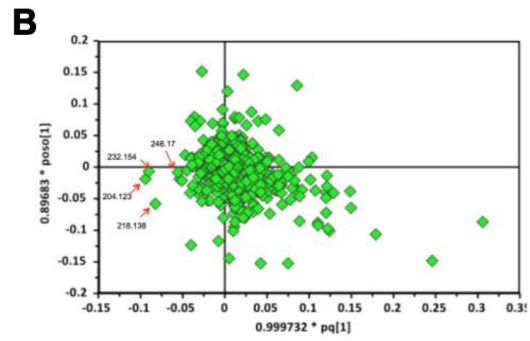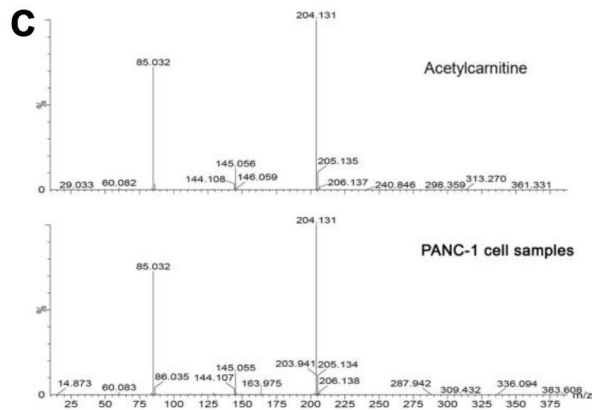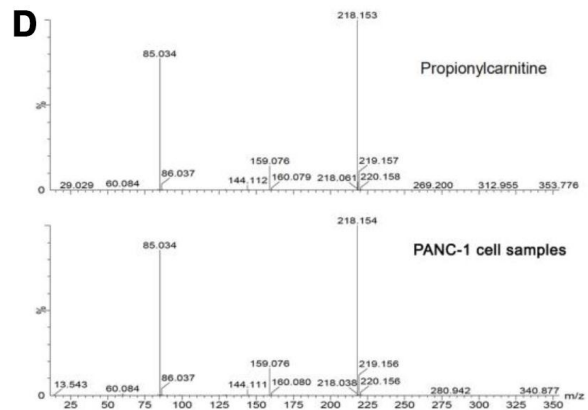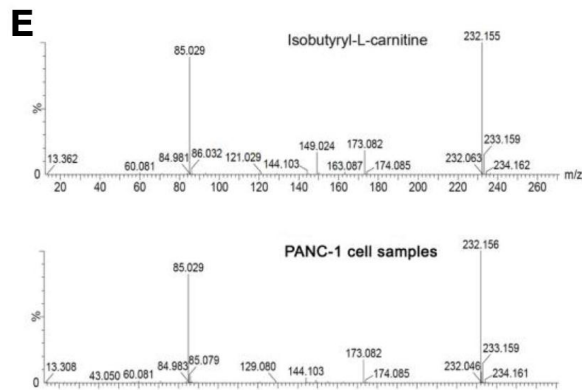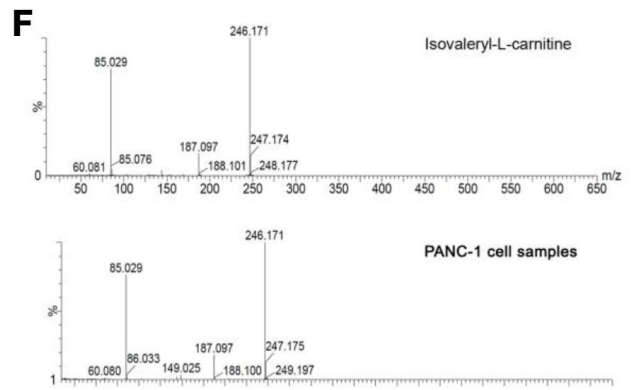

**Supplementary Figure 3. (related to Figure 2). Metabolomics profiles reveal significantly decreased acylcarnitines in senescent vector PANC-1 cells. (A)** PCA score plots of HILIC-ESI-MS metabolomics profiles obtained from HILIC-ESI-MS,  $n = 6/\text{group}$ . **(B)** S-plot of OPLS/DA models of HILIC-ESI-MS data. **(C-F)** Validation of cell metabolite biomarkers by LC-MS/MS analysis. Corresponding MS/MS spectra of authentic chemicals (up) and cell samples (bottom) are shown.

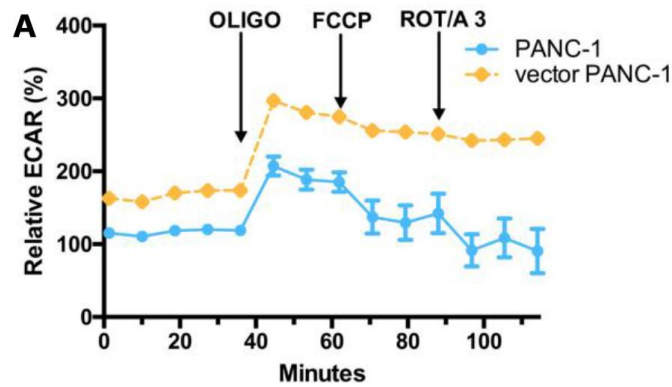

**Supplementary Figure 4. (related to Figure 3). Vector PANC-1 cells exhibited higher glycolytic function. (A)** Glycolytic function in the forms of ECARs (mpH.min<sup>-1</sup>) in senescent vector PANC-1 cells. Data are presented as the mean ± S.E.M, n = 3.

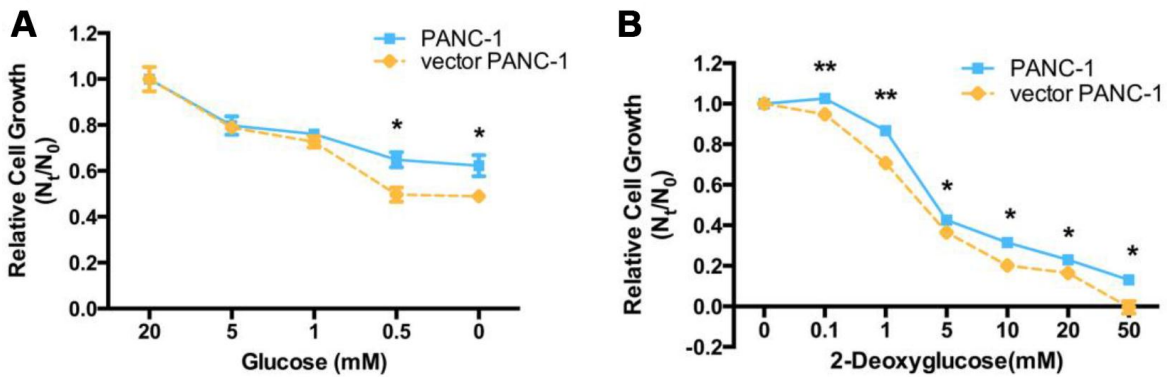

**Supplementary Figure 5. (related to Figure 5). Cell sensitivity to metabolic stress.** Cell sensitivity to metabolic stress from (A) glucose withdrawal and (B) glycolytic inhibition in senescent vector PANC-1 cells at the indicated concentrations is shown. Data are presented as the mean ± S.E.M, n = 5 (\*p < 0.05, \*\*p < 0.01).

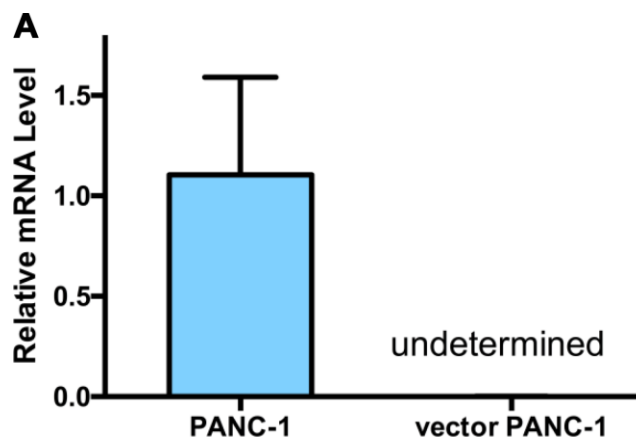

**Supplementary Figure 6. Reduced CDKN1A (P16) mRNA in the senescent vector PANC-1 cells. (A)** Quantitative RT-PCR analysis for P16 was performed in the senescent vector PANC-1 cells.

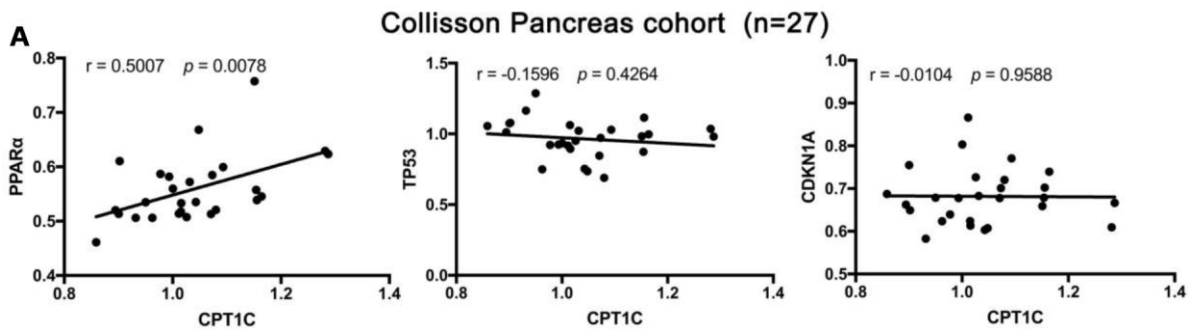

**Supplementary Figure 7. (related to Figure 6). Correlation of crucial signaling components of cellular senescence with CPT1C expression in pancreatic cancer patients. (A) Correlation analysis between *PPARα*, *TP53*, and *CDKN1A* with *CPT1C* mRNA expression in pancreatic cancer patients (data from the Collislon Pancreas cohort, n = 27).**
